# Supplementary material
Source: publisher figshare collection journal article supplement (https://acs.figshare.com/ndownloader/files/4941706)

# checkCIF/PLATON report

Structure factors have been supplied for datablock(s) cb9block

THIS REPORT IS FOR GUIDANCE ONLY. IF USED AS PART OF A REVIEW PROCEDURE FOR PUBLICATION, IT SHOULD NOT REPLACE THE EXPERTISE OF AN EXPERIENCED CRYSTALLOGRAPHIC REFEREE.

No syntax errors found.      CIF dictionary      Interpreting this report

## Datablock: cb9block

---

|                 |                            |                                  |
|-----------------|----------------------------|----------------------------------|
| Bond precision: | C-C = 0.0057 Å             | Wavelength=0.77490               |
| Cell:           | a=8.7293(4)                | b=8.7613(5)      c=38.725(2)     |
|                 | alpha=90                   | beta=91.950(3)      gamma=90     |
| Temperature:    | 100 K                      |                                  |
|                 | Calculated                 | Reported                         |
| Volume          | 2960.0(3)                  | 2960.0(3)                        |
| Space group     | P 21/n                     | P 21/n                           |
| Hall group      | -P 2yn                     | -P 2yn                           |
| Moiety formula  | C30 H22 Fe N6, 2(Cl O4), O | C30 H22 Fe N6, 2(Cl O4),<br>H2 O |
| Sum formula     | C30 H22 Cl2 Fe N6 O9       | C30 H24 Cl2 Fe N6 O9             |
| Mr              | 737.29                     | 739.30                           |
| Dx, g cm-3      | 1.655                      | 1.659                            |
| Z               | 4                          | 4                                |
| Mu (mm-1)       | 0.954                      | 0.898                            |
| F000            | 1504.0                     | 1512.0                           |
| F000'           | 1507.64                    |                                  |
| h,k,lmax        | 12,12,54                   | 12,12,54                         |
| Nref            | 8677                       | 8630                             |
| Tmin,Tmax       | 0.914,0.931                | 0.645,0.747                      |
| Tmin'           | 0.914                      |                                  |

Correction method= MULTI-SCAN

Data completeness= 0.995      Theta(max)= 33.072

R(reflections)= 0.0785( 7493)      wR2(reflections)= 0.1800( 8630)

S = 1.231      Npar= 433

---

The following ALERTS were generated. Each ALERT has the format

**test-name\_ALERT\_alert-type\_alert-level.**

Click on the hyperlinks for more details of the test.

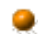

#### Alert level B

|                   |                                                  |           |
|-------------------|--------------------------------------------------|-----------|
| PLAT051_ALERT_1_B | Mu(calc) and Mu(CIF) Ratio Differs from 1.0 by . | 6.21 %    |
| PLAT306_ALERT_2_B | Isolated Oxygen Atom (H-atoms Missing ?) .....   | O1W Check |

**Author Response:** Hydrogens on the lattice oxygen O1W could not be found nor fixed. The presence of these hydrogens is clearly indicated by short contact of O1W with O2 and O3, corresponding to hydrogen bonds. However refinement of hydrogen atoms at the corresponding approximate coordinates with distance restraints did not converge and these hydrogens are thus omitted in the structural model, although taken into account in the formula.

|                   |                           |     |    |    |    |           |
|-------------------|---------------------------|-----|----|----|----|-----------|
| PLAT430_ALERT_2_B | Short Inter D...A Contact | O1W | .. | O3 | .. | 2.69 Ang. |
|-------------------|---------------------------|-----|----|----|----|-----------|

**Author Response:** Hydrogens on the lattice oxygen O1W could not be found nor fixed. The presence of these hydrogens is clearly indicated by short contact of O1W with O2 and O3, corresponding to hydrogen bonds. However refinement of hydrogen atoms at the corresponding approximate coordinates with distance restraints did not converge and these hydrogens are thus omitted in the structural model, although taken into account in the formula.

|                   |                           |     |    |    |    |           |
|-------------------|---------------------------|-----|----|----|----|-----------|
| PLAT430_ALERT_2_B | Short Inter D...A Contact | O1W | .. | O2 | .. | 2.84 Ang. |
|-------------------|---------------------------|-----|----|----|----|-----------|

**Author Response:** Hydrogens on the lattice oxygen O1W could not be found nor fixed. The presence of these hydrogens is clearly indicated by short contact of O1W with O2 and O3, corresponding to hydrogen bonds. However refinement of hydrogen atoms at the corresponding approximate coordinates with distance restraints did not converge and these hydrogens are thus omitted in the structural model, although taken into account in the formula.

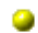

#### Alert level C

|                   |                                      |                                    |              |
|-------------------|--------------------------------------|------------------------------------|--------------|
| PLAT041_ALERT_1_C | Calc. and Reported SumFormula        | Strings Differ                     | Please Check |
| PLAT043_ALERT_1_C | Calculated and Reported Mol. Weight  | Differ by ..                       | 2.01 Check   |
| PLAT068_ALERT_1_C | Reported F000                        | Differs from Calcd (or Missing)... | Please Check |
| PLAT244_ALERT_4_C | Low 'Solvent' Ueq                    | as Compared to Neighbors of        | Cl2 Check    |
| PLAT250_ALERT_2_C | Large U3/U1 Ratio for Average U(i,j) | Tensor ....                        | 2.1 Note     |

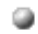

#### Alert level G

|                   |                                            |                                   |              |
|-------------------|--------------------------------------------|-----------------------------------|--------------|
| PLAT042_ALERT_1_G | Calc. and Reported MoietyFormula           | Strings Differ                    | Please Check |
| PLAT083_ALERT_2_G | SHELXL Second Parameter in WGHT            | Unusually Large.                  | 19.22 Why ?  |
| PLAT092_ALERT_4_G | Check: Wavelength given is not Cu,Ga,Mo,Ag | Ka ..                             | 0.7749 Ang.  |
| PLAT432_ALERT_2_G | Short Inter X...Y Contact                  | O1W .. Cl5 ..                     | 2.92 Ang.    |
| PLAT984_ALERT_1_G | The Fe-f' =                                | 0.358 Deviates from the B&C-Value | 0.356 Check  |

---

0 **ALERT level A** = Most likely a serious problem - resolve or explain

4 **ALERT level B** = A potentially serious problem, consider carefully

5 **ALERT level C** = Check. Ensure it is not caused by an omission or oversight  
5 **ALERT level G** = General information/check it is not something unexpected

6 ALERT type 1 CIF construction/syntax error, inconsistent or missing data  
6 ALERT type 2 Indicator that the structure model may be wrong or deficient  
0 ALERT type 3 Indicator that the structure quality may be low  
2 ALERT type 4 Improvement, methodology, query or suggestion  
0 ALERT type 5 Informative message, check

---

It is advisable to attempt to resolve as many as possible of the alerts in all categories. Often the minor alerts point to easily fixed oversights, errors and omissions in your CIF or refinement strategy, so attention to these fine details can be worthwhile. In order to resolve some of the more serious problems it may be necessary to carry out additional measurements or structure refinements. However, the purpose of your study may justify the reported deviations and the more serious of these should normally be commented upon in the discussion or experimental section of a paper or in the "special\_details" fields of the CIF. checkCIF was carefully designed to identify outliers and unusual parameters, but every test has its limitations and alerts that are not important in a particular case may appear. Conversely, the absence of alerts does not guarantee there are no aspects of the results needing attention. It is up to the individual to critically assess their own results and, if necessary, seek expert advice.

### **Publication of your CIF in IUCr journals**

A basic structural check has been run on your CIF. These basic checks will be run on all CIFs submitted for publication in IUCr journals (*Acta Crystallographica*, *Journal of Applied Crystallography*, *Journal of Synchrotron Radiation*); however, if you intend to submit to *Acta Crystallographica Section C* or *E*, you should make sure that full publication checks are run on the final version of your CIF prior to submission.

### **Publication of your CIF in other journals**

Please refer to the *Notes for Authors* of the relevant journal for any special instructions relating to CIF submission.

---

**PLATON version of 20/08/2014; check.def file version of 18/08/2014**

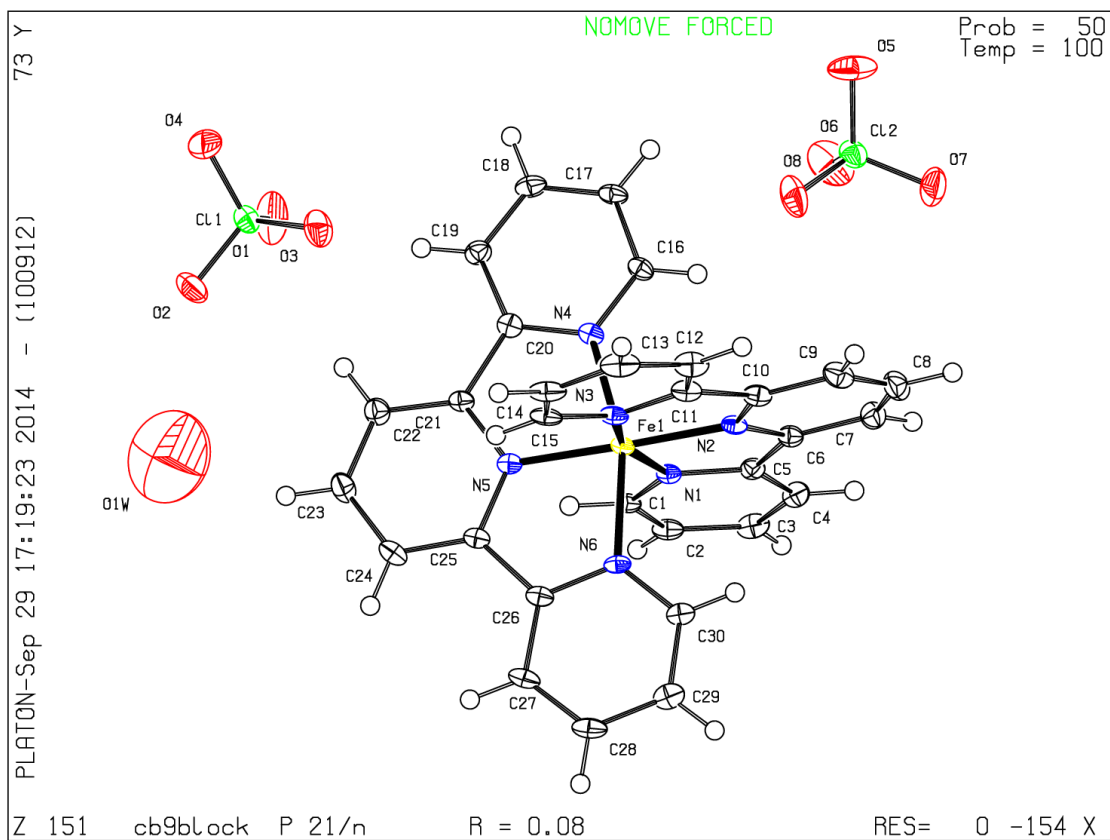

Supplement: Supplementary file 1 [file 4941706]
